# Supplementary material
Source: PubMed Central journal article supplement (PMC5033262)
Supplement: DB160199SupplementaryData1.pdf [file DB160199SupplementaryData1.pdf]

SUPPLEMENTARY DATA

**Supplementary Figure 1. QQ plot of association statistics in genome-wide scan for discovery effort (n= 16,753 participants) in Model 1 (adjusted for age and sex only).**

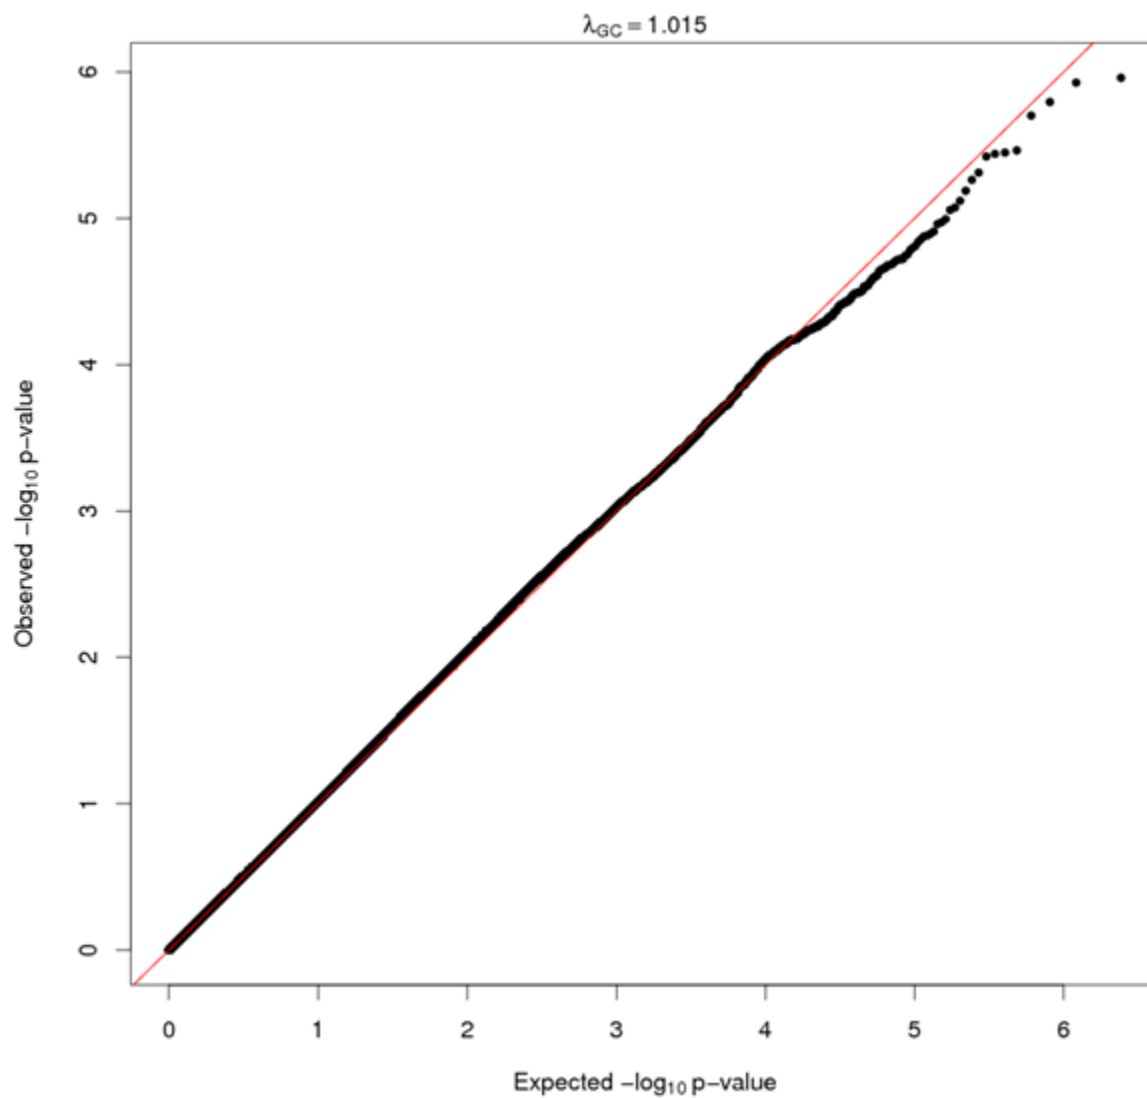

).

SUPPLEMENTARY DATA

**Supplementary Figure 2. QQ plot of association statistics in genome-wide scan for discovery effort (n= 16,735 participants) in Model 2 (adjusted for age, sex, and body mass index).**

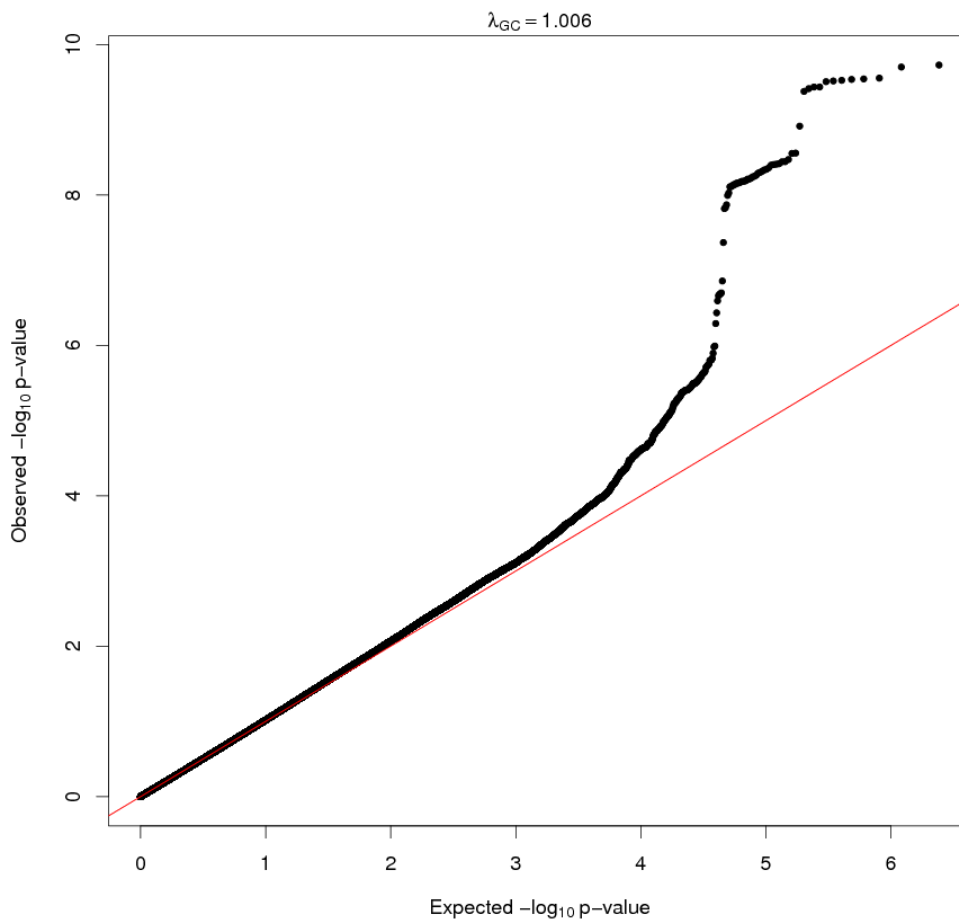

SUPPLEMENTARY DATA

**Supplementary Figure 3. QQ plot of association statistics in genome-wide scan for discovery effort (n= 16,735) participants in Model 3 (adjusted for age and sex and analyzing combined influence of the SNP effect adjusted for body mass index [BMI] and the interaction effect between genotype and BMI on ISI).**

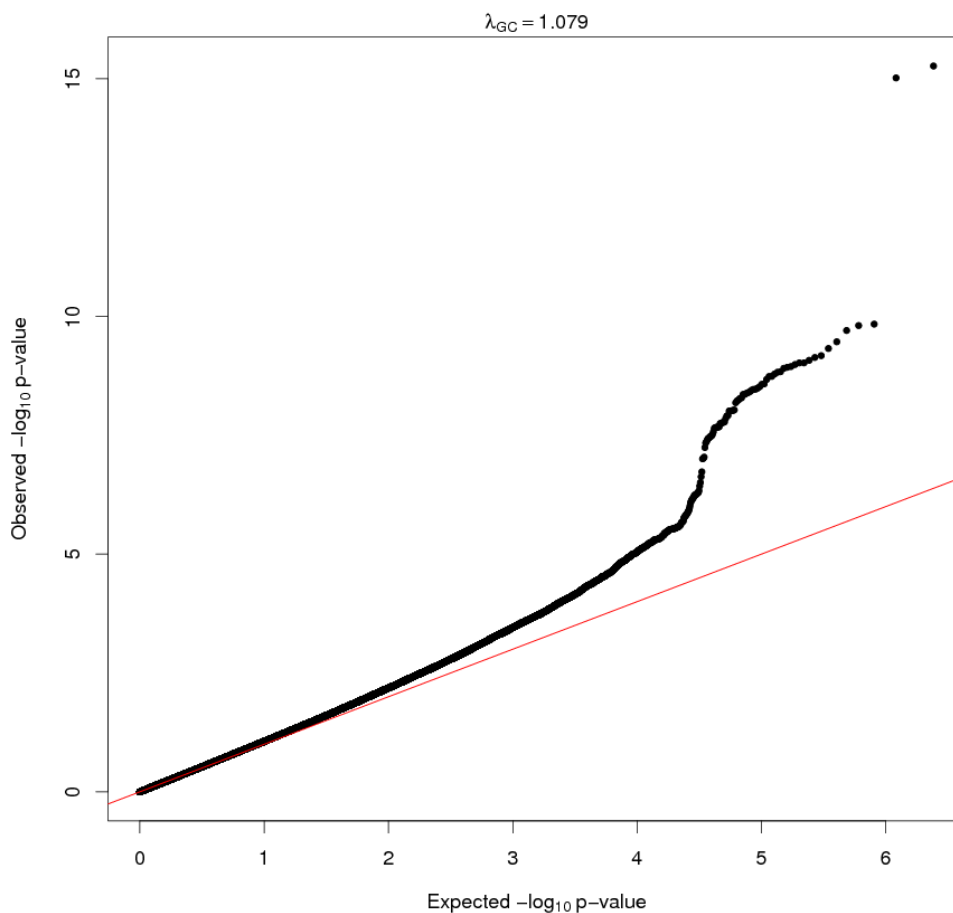

SUPPLEMENTARY DATA

**Supplementary Figure 4. Forrest Plot for association of rs12454712 (*BCL2*) with the ISI in Model 1 and Model 2 of the discovery and replication cohorts.**

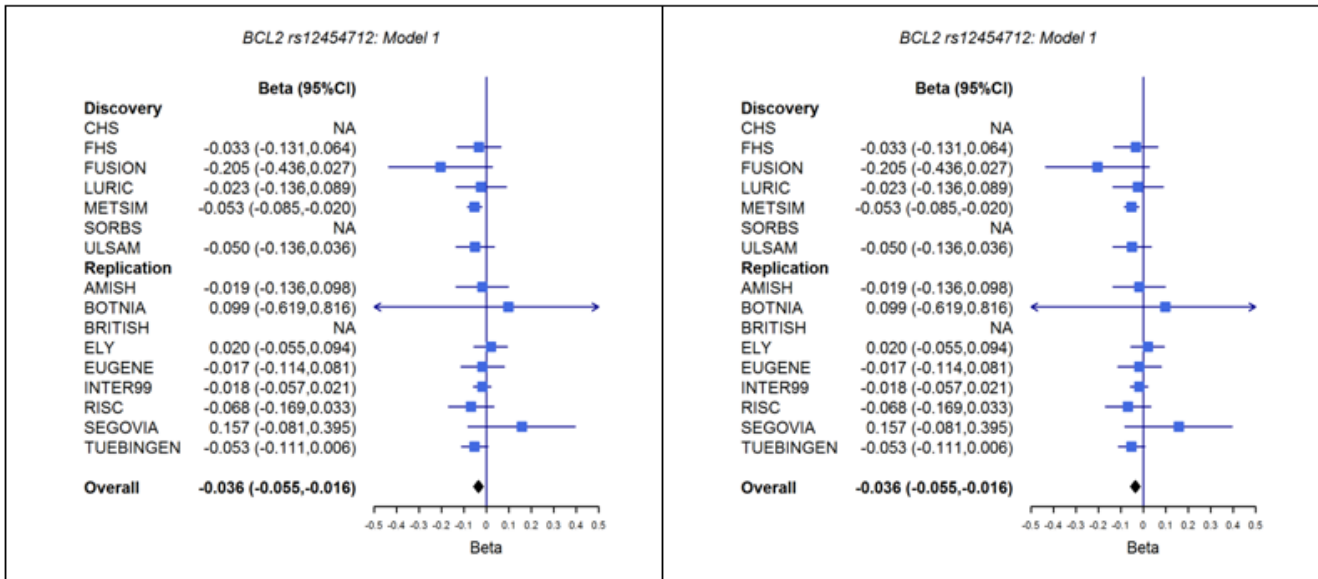

**Supplementary Figure 5. Forrest Plot for association of rs10506418 (*FAM19A2*) with the ISI in Model 1 and Model 2 of the discovery and replication cohorts.**

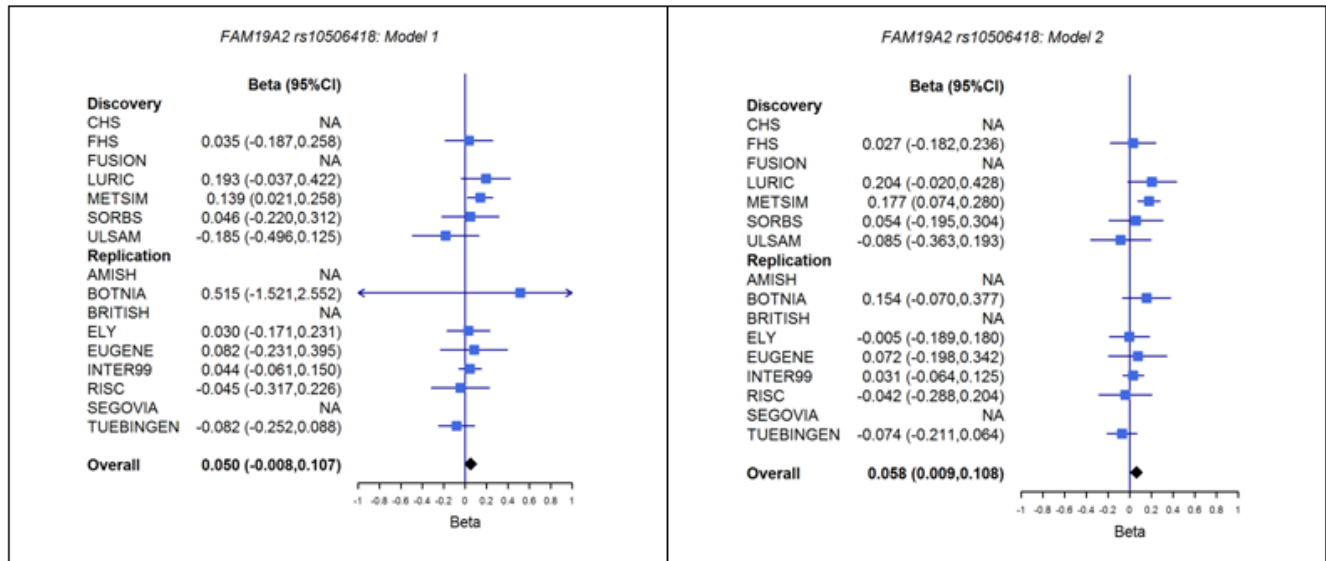

Supplementary Figure 6. Locus Zoom plot for associations at rs12454712 (*BCL2*)

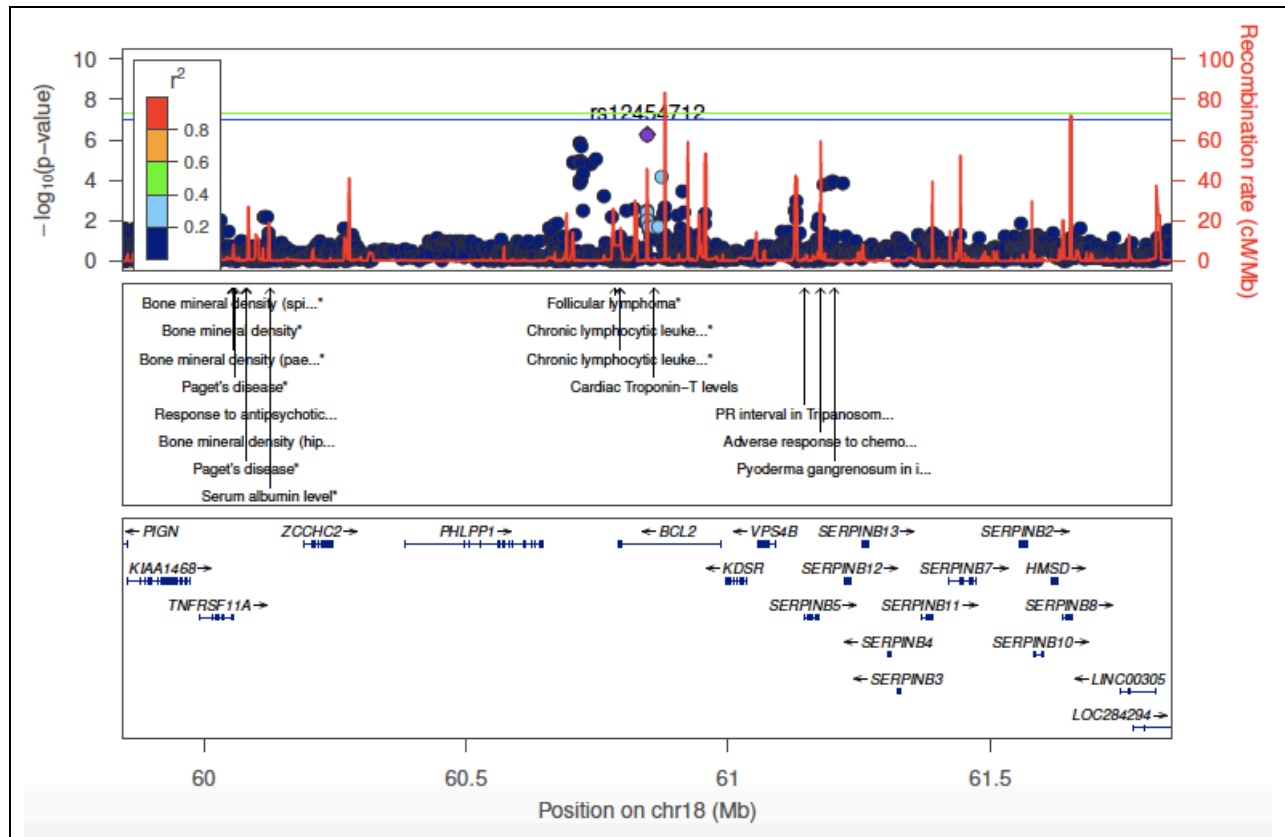

The LocusZoom plot (1) is shown for rs12454712 (*BCL2*) and other SNPs within 1MB for association with ISI in Model 3 (adjusted for age, sex, and BMI and tested the interaction between genotype and BMI) in the discovery cohorts. GWAS catalog traits are presented at the bottom and those traits with a genome-wide significant association ( $P < 5 \times 10^{-8}$ ) are marked with \*. The green horizontal line indicates  $P = 5 \times 10^{-8}$  and the blue horizontal line indicates  $P = 1 \times 10^{-7}$ . Prum RJ, Welch RP, Sanna S, Teslovich TM, Chines PS, Gliedt TP, Boehnke M, Abecasis GR, Willer CJ. LocusZoom: regional visualization of genome-wide association scan results. *Bioinformatics* 2010; 26:2336-2337

**Supplementary Figure 7. Locus Zoom plot for associations at rs10506418 (*FAM19A2*)**

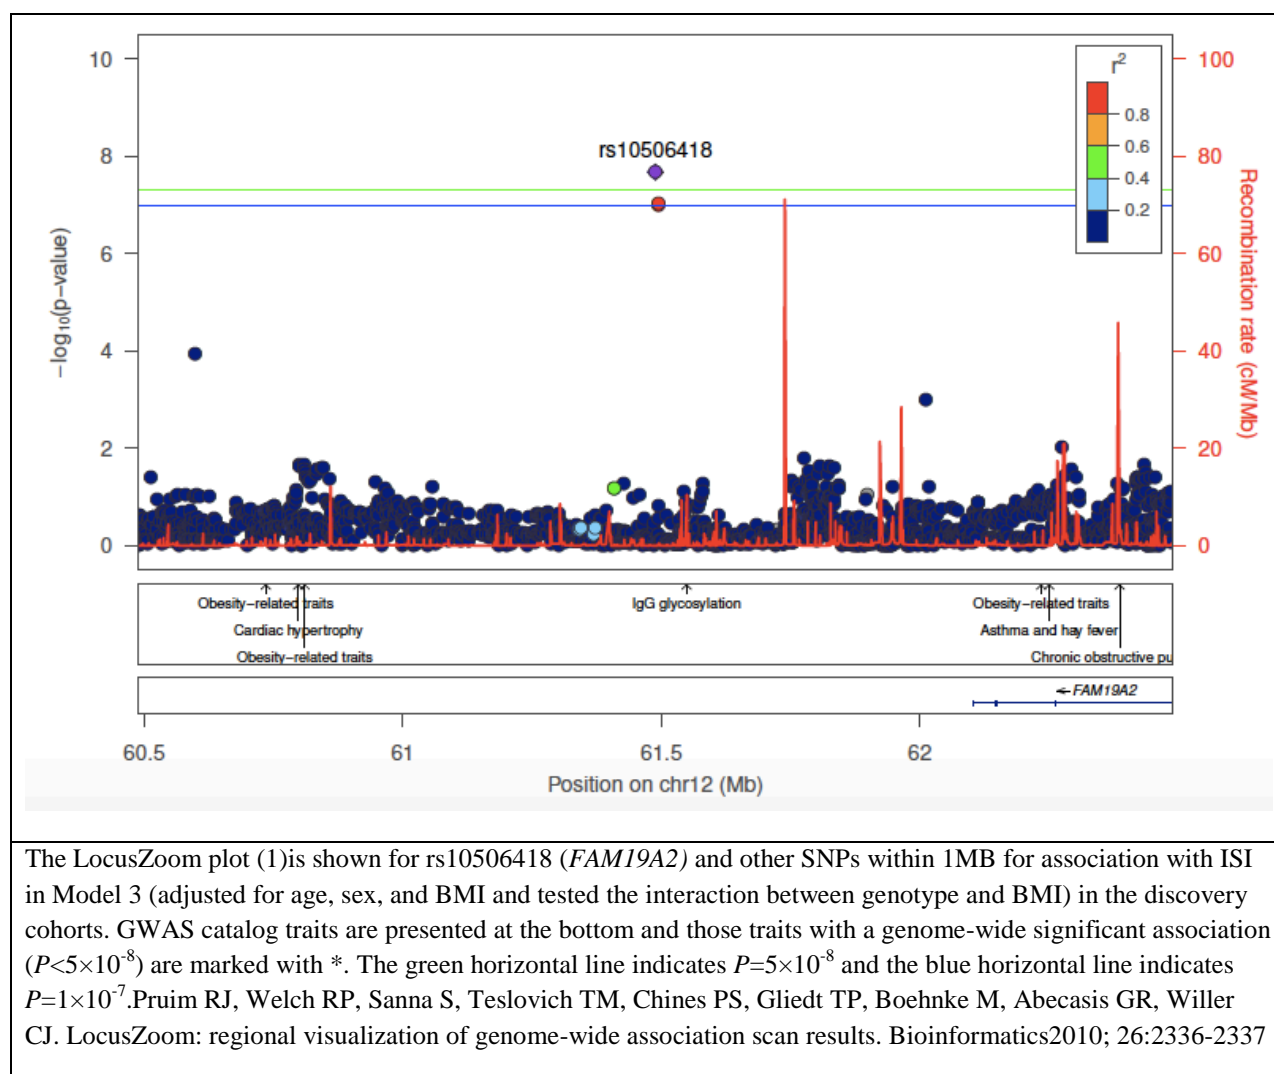

The LocusZoom plot (1) is shown for rs10506418 (*FAM19A2*) and other SNPs within 1MB for association with ISI in Model 3 (adjusted for age, sex, and BMI and tested the interaction between genotype and BMI) in the discovery cohorts. GWAS catalog traits are presented at the bottom and those traits with a genome-wide significant association ( $P < 5 \times 10^{-8}$ ) are marked with \*. The green horizontal line indicates  $P = 5 \times 10^{-8}$  and the blue horizontal line indicates  $P = 1 \times 10^{-7}$ . Pruijm RJ, Welch RP, Sanna S, Teslovich TM, Chines PS, Gliedt TP, Boehnke M, Abecasis GR, Willer CJ. LocusZoom: regional visualization of genome-wide association scan results. *Bioinformatics* 2010; 26:2336-2337
